# Supplementary material
Source: PubMed Central journal article supplement (PMC5514671)
Supplement: AEM.00396-17_zam999117955s1.pdf [file AEM.00396-17_zam999117955s1.pdf]

**Table S1.** Compounds from LOPAC library that inhibited the growth of *M. maripaludis*<sup>a</sup>

| Structure                                                                          | Mol Weight | Molecular Name                                |
|------------------------------------------------------------------------------------|------------|-----------------------------------------------|
| 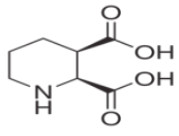  | 173.17     | (+)-cis-Piperidine-2,3-dicarboxylic acid      |
|    | 320.42     | (R,R)-cis-Diethyl tetrahydro-2,8-chrysenediol |
|    | 444.25     | 1,3-PBIT<br>Dihydrobromide                    |
|    | 156.18     | 2,2'-Bipyridyl                                |
|    | 206.63     | 3-Morpholinosydnonimine hydrochloride         |
|   | 481.47     | Bromoacetyl alprenolol methane                |
|  | 542.65     | Calcimycin                                    |
|  | 687.70     | Calmidazolium chloride                        |
|  | 383.82     | Chelerythrine chloride                        |
|  | 1202.61    | Cyclosporin A                                 |

|                                                                                     |        |                               |
|-------------------------------------------------------------------------------------|--------|-------------------------------|
| 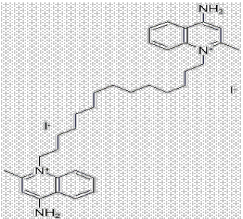    | 766.58 | Dequalinium analog            |
|     | 527.57 | Dequalinium dichloride        |
|     | 314.55 | Diphenyleneiodonium chloride  |
|     | 301.51 | DL-erythro-Dihydrosphingosine |
|     | 246.31 | Ellipticine                   |
|    | 475.57 | Fluspirilene                  |
|  | 276.21 | Flutamide                     |
|  | 311.29 | Icilin                        |
|   | 533.95 | Idarubicin                    |
|   | 317.22 | Nilutamide                    |
|   | 322.19 | Oxotremorine                  |
|   | 450.49 | PD 168,077 maleate            |

|                                                                                    |        |                                                         |
|------------------------------------------------------------------------------------|--------|---------------------------------------------------------|
| 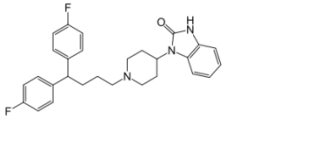    | 461.55 | Pimozide                                                |
|    | 263.34 | Pinacidil                                               |
|    | 414.41 | Piribedil maleate                                       |
|    | 418.52 | Pregnenolone sulfate sodium                             |
|    | 272.77 | Procaine hydrochloride                                  |
|   | 320.88 | Promazine hydrochloride                                 |
|  | 374.35 | Quipazine, 6-nitro maleate                              |
|  | 345.79 | S-(+) Fluoxetine hydrochloride                          |
|  | 299.49 | Sphingosine                                             |
|  | 477.57 | Ritanserin                                              |
|  | 603.75 | Salmeterol                                              |
|  | 367.78 | Sanguinarine chloride                                   |
|  | 255.79 | Ro 41-1049 hydrichloride / (-)-Quinpirole hydrochloride |

|                                                                                  |                  |                                                                          |
|----------------------------------------------------------------------------------|------------------|--------------------------------------------------------------------------|
| 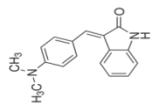 | 264.32           | SU 4312; 3-(4-Dimethylaminobenzylidene)-2-indolinone                     |
|  | 563.64<br>371.51 | Tamoxifen citrate<br>Tamoxifen                                           |
|  | 292.13           | UK 14,304 /5-Bromo-N-(2-imidazolyl-2-yl)-6-quinoxalinamine               |
|  | 613.68           | SKF95282/N-[3-[3-(1-Piperidinyl)methyl]phenoxy]propyl]2benzothiazolamine |
|  | 401.50           | Urapidil,-5-Methyl                                                       |
|  | 129.16           | (±)-Vigabatrin                                                           |

<sup>a</sup>The LOPAC library (1280 compounds) was screened at a final concentration of 20  $\mu\text{M}$  in a 96-well microtiter plate format. Plates were incubated for 5 days at 37°C and the  $\text{OD}_{600}$  recorded on a plate reader. Forty-one compounds inhibited the final growth yield ( $\text{OD}_{600}$ ) by > 90% compared to the DMSO (1%)-treated control were identified as inhibitors. The screen was characterised by an average Z-factor of 0.67.

**TABLE S2.** Natural products that inhibited the growth of *M. maripaludis*<sup>a</sup>

| Structure                                                                                                                                                                                                                                                                                                                                                                                              | Mol Weight | Name                       |
|--------------------------------------------------------------------------------------------------------------------------------------------------------------------------------------------------------------------------------------------------------------------------------------------------------------------------------------------------------------------------------------------------------|------------|----------------------------|
| 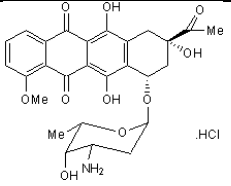 <p>The structure shows a tetracyclic anthracycline core with a methoxy group at C-10, hydroxyl groups at C-1, C-5, and C-7, and a glycosidic attachment at C-4. The glycoside is a 2-deoxy-2-(2-amino-2-hydroxyethyl)ribose derivative. The entire molecule is associated with a hydrochloride counterion (HCl).</p> | 563.98     | Daunorubicin hydrochloride |
|  <p>The structure is a lumichrome derivative of riboflavin, featuring a methyl group at the 7-position of the isoalloxazine ring system.</p>                                                                                                                                                                          | 242.24     | Riboflavin lumichrome      |
|  <p>The structure is a xanthone derivative with a complex side chain at C-1, including a methoxy group and a prenyl group, and hydroxyl groups at C-2 and C-3.</p>                                                                                                                                                    | 410.47     | Mangostin                  |
|  <p>The structure is a pentacyclic ellipticine derivative with two methyl groups at the 1 and 4 positions of the pyridine ring.</p>                                                                                                                                                                                   | 246.31     | Ellipticine                |
|  <p>The structure is a complex polycyclic aromatic compound with a nitro group and a methoxy group on one of the rings, and a carboxylic acid group on another.</p>                                                                                                                                                  | 341.28     | Aristolochic acid          |
|  <p>The structure is a complex polycyclic compound with multiple hydroxyl, methyl, and aldehyde groups, and a complex side chain.</p>                                                                                                                                                                               | 398.46     | Norlobaric acid            |
|  <p>The structure is a complex polycyclic compound with multiple hydroxyl groups, a methoxy group, and a sodium counterion (Na+).</p>                                                                                                                                                                               | 747.96     | Nigericin sodium salt      |
|  <p>The structure is a large, cyclic polyether antibiotic consisting of a macrocyclic ring with multiple ether linkages and side chains.</p>                                                                                                                                                                        | 1111.34    | Valinomycin                |
|  <p>The structure is a highly complex, multi-ring natural product with numerous functional groups, including hydroxyl, carbonyl, and ether groups.</p>                                                                                                                                                              | 1112.37    | Didemnin B                 |

|                                                                                     |         |                                   |
|-------------------------------------------------------------------------------------|---------|-----------------------------------|
| 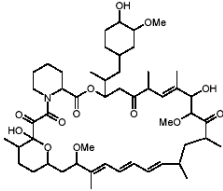    | 914.19  | Rapamycin                         |
|    | 1255.44 | Actinomycin D                     |
|    | 590.80  | Lasalocid acid                    |
|    | 1336.49 | Tetrocarcin A                     |
|  | 816.95  | Michellamine B diacetic acid salt |
|  | 1648.85 | SIOMYCIN A                        |
|  | 546.53  | Chaetochromin                     |
|  | 1101.27 | Echinomycin A                     |

<sup>a</sup>The natural product in house library (120 compounds) was screened at a final concentration of 20  $\mu$ M in a 96-well microtiter plate format . Plates were incubated for 5 days at 37°C, and the OD<sub>600</sub> was

recorded on a plate reader. All compounds that reduced the growth yield by > 90% compared to the DMSO (1%)-treated control were considered inhibitory. The screen was characterised by an average Z-factor of 0.78.
